# Supplementary material
Source: ML conference proceedings conference paper supplement (https://openreview.net/forum?id=ZL5sLJBMrV)
Supplement: supplementary_material [file attachment]

# PD-FS: A FREQUENCY-AWARE SURROGATE AND CFD FRAMEWORK FOR EFFICIENT DRL CONTROL OF ROBOTIC FISH

**Anonymous authors**

PAPER UNDER DOUBLE-BLIND REVIEW

## ABSTRACT

While deep reinforcement learning (DRL) has demonstrated broad potential in sequential decision-making, its application to fluid–dynamic systems remains limited by the prohibitive cost of high-fidelity simulations and the difficulty of capturing multi-scale unsteady behaviors. In this work, we focus specifically on aquatic locomotion of fish-like robotic, where the control objective is to track specific target point while maintaining energy efficiency within the constrained time. The agent observes low-dimensional kinematic states and flow-related signals, and outputs oscillation frequency commands that drive body undulation. These sensing–action constraints define a task that requires both accurate flow responses and fast, iterative learning. Motivated by these domain-specific requirements, we propose a task-oriented *Physical Data-Driven Flow Simulation (PD-FS)* framework—a staged pipeline that couples lightweight neural surrogates with physics-guided refinement in full-order CFD. PD-FS incorporates mode-conditioned surrogate models with cycle-locked and memory-aware updates, enabling sample-efficient training while faithfully reproducing critical frequency-switching dynamics. Rather than claiming general applicability, we position PD-FS as an engineering integration tailored for fish swimming control under fluid–structure interaction. Policies refined in the CFD solvers adapt to nonlinear flow responses without relying on extensive domain randomization. In controlled fish-locomotion benchmarks, PD-FS achieves nearly 50 times faster training compared with CFD-only baselines, while reducing energy expenditure by over 20% at comparable success rates. These results highlight PD-FS as a domain-specific surrogate to CFD workflow for efficient and physically consistent control of fish-like robotics.

## 1 INTRODUCTION

Control of complex dynamical systems is a long-standing challenge in robotics, fluid mechanics, and embodied intelligence. Agents operating in such environments must adapt their actions to nonlinear dynamics, strong coupling effects, and disturbances that evolve across multiple scales (Huang et al., 2025). Fish-like aquatic locomotion represents a canonical instance of this challenge. The control objective in swimming is usually to achieve stable and energy-efficient forward propulsion, where the robot observes low-dimensional kinematic states such as body velocity, orientation, and outputs oscillation frequency commands. These actions generate thrust through body undulations that interact with unsteady vortices, forming a tightly coupled fluid–structure control problem constrained by hydrodynamic forces, wake interactions, and actuation limits. By clearly defining this sensing–action structure and its corresponding objectives, we restrict the scope to underwater locomotion rather than broader robotic domains such as manipulation or aerial vehicles.

Achieving fast control learning under physically realistic dynamics remains a central obstacle. High-fidelity computational fluid dynamics (CFD) solvers accurately capture vortex shedding, added-mass interactions, and wake-body coupling, but their prohibitive computational cost often requiring millions of interactions and weeks of wall-clock time, making them unsuitable for iterative DRL

054 training. Simplified surrogate models offer much faster rollouts, yet they typically miss crucial  
055 nonlinearities such as unsteady vortex dynamics or frequency-switching hysteresis, causing drift  
056 and instability over long horizons. For underwater locomotion in particular, correctly capturing how  
057 flow responds to variations in oscillation frequency is essential, as thrust generation fundamentally  
058 depends on frequency-conditioned vortex dynamics.

059 The broader DRL and model-based control community has explored numerous strategies to address  
060 the fidelity–efficiency trade-off, including world models for imagined rollouts, high-throughput  
061 physics engines such as Isaac Gym and Brax (Makoviychuk & et al., 2021; Freeman & Coauthors,  
062 2021), and transfer techniques such as domain randomization (Tobin et al., 2017; Peng et al., 2018)  
063 and residual policy learning (Chebotar & et al., 2019). However, these general-purpose approaches  
064 do not directly address the unique demands of fish locomotion, where wake-mediated thrust genera-  
065 tion requires CFD-level accuracy, yet CFD alone is too slow for end-to-end DRL. This gap motivates  
066 the surrogate–CFD integration for fish robotics.

067 In this work, we introduce a task-focused *Physical Data-Driven Flow Simulation (PD-FS)* frame-  
068 work designed specifically for thunniform swimming. This staged paradigm couples a frequency-  
069 conditioned surrogate—capable of efficiently capturing mode-switching flow responses—with  
070 physics-guided refinement in full-order CFD, thereby avoiding the limitations associated with re-  
071 lying solely on either fast-but-inaccurate surrogates or accurate-but-slow CFD solvers. Unlike prior  
072 broad formulations, PD-FS is explicitly positioned as an engineering pipeline for underwater loco-  
073 motion, enabling efficient pretraining in surrogate environments before hydrodynamic alignment in  
074 CFD.

075 By demonstrating robust performance across surrogate, simulation, and physical robotic platforms,  
076 PD-FS provides a domain-specific pathway for accelerating DRL training while maintaining the  
077 hydrodynamic realism essential for underwater locomotion. Our main contributions are as follows:

- 078 1. We propose a modular three-stage pipeline—surrogate pretraining, CFD refinement, and  
079 real-world deployment—that unifies efficiency, fidelity, and scalability for fish-like loco-  
080 motion control.
- 081 2. We demonstrate that surrogate-guided pretraining accelerates policy learning by nearly two  
082 orders of magnitude, while CFD refinement ensures physical alignment without sacrificing  
083 stability.
- 084 3. We validate successful sim-to-real transfer on a physical robotic fish, demonstrating stable  
085 straight-line locomotion on hardware. Additional evaluations across varying flow regimes  
086 and perturbations are conducted in simulation to assess broader robustness.

## 088 2 RELATED WORK

089 Learning control policies for complex dynamical systems poses significant challenges for DRL, par-  
090 ticularly in terms of sample efficiency, computational scalability, and robustness under real-world  
091 variability. A large body of work has sought to address these challenges from complementary direc-  
092 tions.

093 **Model-based DRL and world models.** These methods enhance data efficiency by learning pre-  
094 dictive dynamics for planning. Approaches range from probabilistic ensembles that stabilize learn-  
095 ing via uncertainty propagation, to latent-dynamics models like Dreamer that optimize behaviors  
096 in “imagination” (Hafner et al., 2020). Recent works also integrate compliant control to improve  
097 robustness in high-dimensional real-world systems (Jin et al., 2021).

098 **High-throughput simulators.** Parallelized physics engines like Isaac Gym and Brax co-locate sim-  
099 ulation and learning on GPUs/TPUs, achieving orders-of-magnitude speedups over standard bench-  
100 marks (e.g., MuJoCo) (Freeman et al., 2021; Makoviychuk & et al., 2021). These systems enable  
101 millions of steps per second, proving that simulation scalability is fundamental for practical RL.

102 **Transfer strategies.** Bridging discrepancies between training and deployment has motivated tech-  
103 niques such as domain randomization, dynamics randomization, system identification, and progres-  
104 sive curriculum transfer. These methods improve robustness across varying conditions but often re-  
105 quire extensive manual tuning or broad randomization ranges, which can limit generalization (Chen  
106 et al., 2022; Ye et al., 2021).

**Hybrid and residual learning.** When approximate models or handcrafted controllers are available, residual policy learning augments them with learned corrective terms, providing a pragmatic balance between prior structure and adaptability (Li et al., 2023). This perspective aligns with progressive refinement: imperfect but fast models guide exploration, while learned residuals correct for unmodeled dynamics.

**Aquatic locomotion and DRL/MBRL for fluid control.** Domain-specific aquatic platforms such as FishGym demonstrate agile swimming behaviors in high-fidelity environments without explicit CPG structures (Liu et al., 2022). Beyond FishGym, several groups at Caltech, Stanford, Harvard, and the University of Washington have explored DRL or MBRL for vortex-mediated flow control, wake manipulation, and bio-inspired propulsion. Examples include DRL for cylinder wake suppression and active flow control (Rabault et al., 2019), Koopman-based or operator-learning models for unsteady vortex dynamics (Cheng et al., 2020), vortex-informed control of flapping foils (Novati et al., 2021), and MBRL for robotic fish maneuvering under varying Re regimes (Wang et al., 2022). These works demonstrate strong performance in specific flow configurations, but typically rely on a single high-fidelity simulator or a single learned model, without combining mode-partitioned surrogates with CFD refinement. They also tend to require larger datasets, longer wall-clock training time, or limited sim-to-real evaluations.

**Aquatic robotics.** Finally, domain-specific robotic platforms have validated learning-based underwater propulsion and control. FishGym shows fish–fish interactions and wake capture; Harvard’s soft-robotic swimmers explore compliant actuation under experimentally measured flows; and UW/Caltech platforms investigate vortex exploitation and fast turning dynamics. **However, few provide a staged surrogate→CFD→real pipeline, nor do they explicitly address frequency-switching hysteresis.**

Taken together, these strands of research illustrate active progress on the challenges of efficiency, scalability, and robustness in DRL. Yet, a unified framework that integrates surrogate efficiency, high-fidelity fidelity, and transferability to embodied agents remains underexplored. **Our work advances this landscape by introducing a physics-partitioned surrogate (frequency-conditioned sub-networks) coupled with CFD refinement, achieving (i) significantly reduced data requirements compared to full-order CFD, (ii) orders-of-magnitude lower wall-clock training time, and (iii) robust sim-to-real transfer on a physical robotic fish. These improvements specifically address limitations in prior aquatic-control systems, which generally lack mode-switching awareness, CFD refinement, or real-robot validation.**

### 3 PROBLEM FORMULATION AND PRELIMINARIES

The task is *time-constrained point-to-point locomotion* of a bio-inspired robotic fish, where the agent must reach a target within horizon  $T$  while minimizing energy use and maintaining trajectory stability.

**Flow dynamics.** The fluid–body interaction follows incompressible Navier–Stokes (NS) equations with moving boundary forcing Maertens et al. (2017); Mittal & Iaccarino (2005):

$$\nabla \cdot \mathbf{u} = 0, \quad \frac{\partial \mathbf{u}}{\partial t} + (\mathbf{u} \cdot \nabla) \mathbf{u} = -\frac{1}{\rho} \nabla p + \nu \nabla^2 \mathbf{u} + \mathbf{f}_{\text{body}}, \quad (1)$$

where  $\mathbf{u}$  is velocity,  $p$  pressure,  $\rho$  density,  $\nu$  kinematic viscosity, and  $\mathbf{f}_{\text{body}}$  hydrodynamic forcing.

**Fish body model.** To approximate CPG-driven deformation, the body is reduced to three generalized joints  $\mathbf{q}(t) \in \mathbb{R}^3$  Ozmen Koca et al. (2018); Chowdhury et al. (2014). Its dynamics follow Euler–Lagrange form Spong et al. (2020):

$$\mathbf{M}(\mathbf{q})\ddot{\mathbf{q}} + \mathbf{C}(\mathbf{q}, \dot{\mathbf{q}})\dot{\mathbf{q}} + \mathbf{G}(\mathbf{q}) = \boldsymbol{\tau}(t) + \boldsymbol{\tau}_{\text{hydro}}(\mathbf{u}, p), \quad (2)$$

with  $\mathbf{M}$  mass–inertia,  $\mathbf{C}$  Coriolis,  $\mathbf{G}$  restoring forces,  $\boldsymbol{\tau}(t)$  actuation torque, and  $\boldsymbol{\tau}_{\text{hydro}}$  hydrodynamic load.

**Control objective.** The problem is a finite-horizon optimal control task:

$$\min_{\pi} \mathbb{E}_{\pi} \left[ \sum_{t=0}^T \alpha \|\mathbf{x}_t - \mathbf{x}^*\|^2 \right], \quad (3)$$

where  $\mathbf{x}_t$  is centroid position,  $\mathbf{x}^*$  the target Taira et al. (2020).

Since the action space is parameterized by oscillation frequency  $\omega$  and amplitude  $\alpha$ , the surrogate must faithfully approximate dynamics under frequency switching. Directly training a monolithic network over all modes leads to drift and instability Spagnolie et al. (2010) Ojo et al. (2022), as the system exhibits distinct delay and hysteresis behaviors when  $\omega$  increases, decreases, or remains constant. To address this, we introduce a mode classifier

$$c(\mathbf{a}_t, \mathbf{a}_{t-1}) \in \{\text{const, up, down}\}, \tag{4}$$

which identifies the switching regime by comparing the current command  $\mathbf{a}_t$  with the previous one  $\mathbf{a}_{t-1}$ . The surrogate then routes the transition into one of three specialized subnetworks

$$\Delta \mathbf{s}_t \approx f_{\theta(c)}(\mathbf{s}_t, \mathbf{a}_t), \quad c \in \{\text{const, up, down}\}, \tag{5}$$

where each  $f_{\theta(c)}$  is implemented as a residual MLP He et al. (2015). This partitioned design aligns the model structure with the intrinsic regime-dependent nonlinearities, yielding more accurate approximations of state transitions and mitigating long-horizon error accumulation.

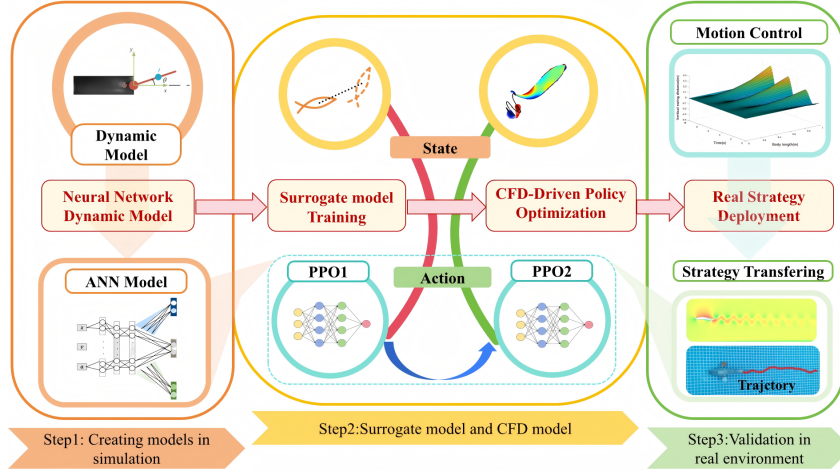

Figure 1: The three-stage PD-FS pipeline. The framework begins with (Step 1) creating an ANN surrogate model from simulation. This surrogate is used for efficient policy pre-training (PPO1), before the policy is transferred for high-fidelity refinement in the CFD solver (PPO2). Finally, the refined policy is (Step 3) validated on the real robotic fish.

## 4 METHODOLOGY

We propose a Physical Data-Driven Flow Simulation (PD-FS) framework, a three-stage pipeline detailed in Figure 1. This pipeline features a core training loop (Step 2) that begins with efficient surrogate-based pre-training before proceeding to high-fidelity CFD-based refinement.

### 4.1 DYNAMICS DATA ACQUISITION AND MODEL CONSTRUCTION

To assess surrogate design, we compared global networks trained across all regimes with mode-partitioned alternatives. Global MLP, GNN, and Res-MLP baselines struggled to capture regime-specific hysteresis and exhibited noticeable long-horizon drift (Li et al., 2021; Sanchez-Gonzalez et al., 2020). The assessment results are shown in Figure 2, which plots the  $R^2$  performance of these 'global' models (a) Single network fitting against our proposed partitioned approach (b) Partitioned network fitting. This comparison clearly demonstrates the superior accuracy and convergence speed of the partitioned design.

Partitioned surrogates, by contrast, achieved clearer mode separation and reduced compounding error.

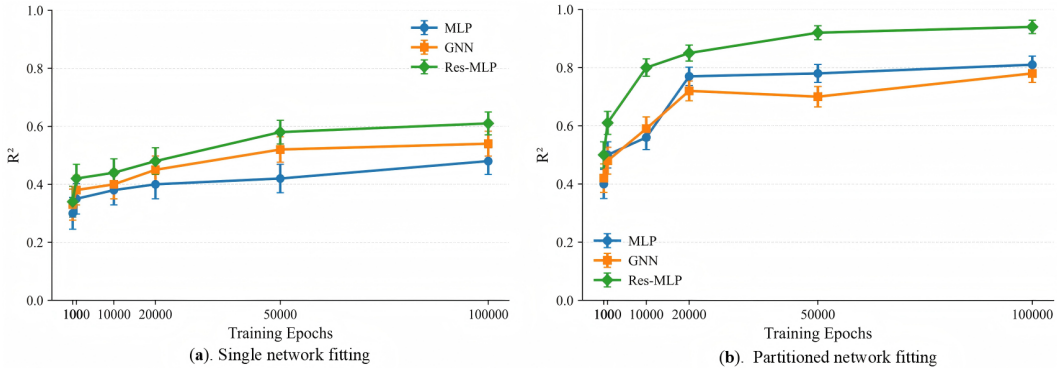

Figure 2: Selection of Network Architecture. A comparison of (a) "Single network fitting" (a global model) versus (b) "Partitioned network fitting" (our proposed method). The partitioned approach validates our physics-based design by achieving significantly faster convergence and superior accuracy ( $R^2 > 0.9$  for the Res-MLP), far exceeding the global model's peak performance ( $R^2$  around 0.6).

Each surrogate minimizes a rollout-consistent loss

$$\mathcal{L}(\theta) = \frac{1}{N} \sum_{t=1}^N \|\hat{\mathbf{s}}_{t+1} - \mathbf{s}_{t+1}\|^2, \tag{6}$$

while the partitioned objective decomposes by regime,

$$\mathcal{L}_{\text{part}} = \sum_{c \in \{\text{const, up, down}\}} \frac{1}{N_c} \sum_{t \in \mathcal{D}_c} \|\hat{\mathbf{s}}_{t+1}^{(c)} - \mathbf{s}_{t+1}\|^2, \tag{7}$$

forcing each subnetwork to specialize on its own switching dynamics.

**(1) Mode-conditioned subnetworks.** Fish locomotion exhibits nonlinear, mode-dependent responses to frequency changes. Instead of a single global network, we adopt three specialized residual MLPs for constant, increasing, and decreasing frequency regimes. This partitioning explicitly captures switching hysteresis and improves accuracy near transition boundaries (Ojo et al., 2022).

**(2) Data and  $\Delta s$  targets.** Supervision is defined on increments,

$$\Delta \mathbf{s}_t = \mathbf{s}_{t+1} - \mathbf{s}_t, \tag{8}$$

which reduces multi-step drift. Each subnetwork is selected by the inter-cycle frequency change  $c \in \{\text{const, up, down}\}$ , enforcing cycle-locked updates (He et al., 2025).

**(3) Residual MLP and training.** The rollout state is updated by  $\hat{\mathbf{s}}_{t+1} = \mathbf{s}_t + \hat{\Delta} \mathbf{s}_t$  (Chen et al., 2018).

The loss combines MSE and MAE to balance average error and outliers (Barron, 2019):

$$\mathcal{L}(\theta) = \alpha \text{MSE} + \beta \text{MAE}, \quad \alpha = 0.7, \beta = 0.3. \tag{9}$$

The architecture of this partitioned residual MLP is visualized in Figure 3. The model takes the current state and action ( $x, v, a$ ) as input and uses the inter-cycle frequency change ( $\omega$ ) as a classifier to route the computation to one of three specialized subnetworks (output heads), each responsible for a specific dynamic regime.

#### 4.2 SURROGATE MODEL PRE-TRAINING

To facilitate efficient DRL training without relying on computationally expensive CFD, we construct a data-driven environment based on the surrogate model Liu et al. (2022). Leveraging the frequency-aware structure (Section 4.1), the environment dynamically selects pretrained residual sub-models according to inter-cycle frequency variations, ensuring accurate prediction of nonlinear flow responses.

270  
271  
272  
273  
274  
275  
276  
277  
278  
279  
280  
281  
282  
283  
284  
285  
286  
287  
288  
289  
290  
291  
292  
293  
294  
295  
296  
297  
298  
299  
300  
301  
302  
303  
304  
305  
306  
307  
308  
309  
310  
311  
312  
313  
314  
315  
316  
317  
318  
319  
320  
321  
322  
323

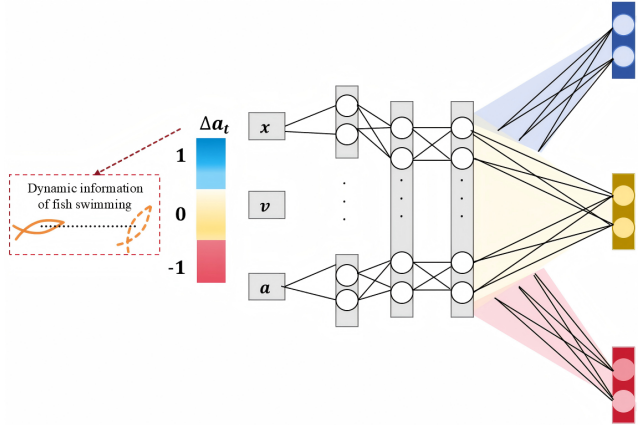

Figure 3: **Partitioned Fitting of Fish Swimming Mechanics:** Visualization of our partitioned surrogate model (Sec 3.3). State inputs are routed by a mode classifier to one of three specialized subnetworks (output heads) to capture frequency-switching hysteresis.

Policy optimization employs the PPO algorithm Schulman et al. (2017) with **cycle-aligned rollouts**, where control actions are locked for one full oscillation cycle. This alignment prevents control-modeling mismatches and enhances simulation stability. Training utilizes Adam (learning rate  $3 \times 10^{-4}$  with linear decay) over batches of  $N_c$  cycles (e.g., 4096 steps). Ultimately, this surrogate-based pre-training yields physically consistent and robust policies, providing a computationally efficient initialization for subsequent high-fidelity CFD refinement.

### 4.3 FULL-ORDER CFD MODEL TRANSFERRING

After surrogate pretraining, the agent acquires a frequency modulation strategy with basic physical consistency. In the final stage, this policy is transferred to a high-fidelity simulator for fine-tuning and task validation. Unlike the surrogate phase, state transitions are now provided directly by the physical solver, closing the loop with accurate flow-body feedback.

We cast fine-tuning as a standard DRL problem:

$$\pi^* = \arg \max_{\pi} \mathbb{E}_{\pi} \left[ \sum_{t=0}^T r(\mathbf{s}_t, \mathbf{a}_t) \right], \tag{10}$$

where the reward balances task completion and energetic efficiency. Specifically, we define

$$r_t = \alpha r_{\text{goal}}(t) - \beta c_{\text{eff}}(t), \tag{11}$$

with  $r_{\text{goal}}$  providing a terminal bonus for reaching the target within horizon  $T$ , and  $c_{\text{eff}}$  denoting the cost of transport (COT). And  $c_{\text{eff}}(t) = \frac{P_t}{mgU_t}$ , where  $P_t$  is the instantaneous propulsion power,  $m$  the body mass,  $g$  the gravitational constant, and  $U_t$  the forward swimming velocity.

The coefficients  $\alpha$  and  $\beta$  control the trade-off between reaching accuracy and efficiency: larger  $\alpha$  encourages fast goal completion, while larger  $\beta$  favors energy-saving gaits.

For policy optimization we adopt PPO, which updates the parameters by maximizing

$$L^{\text{PPO}}(\theta) = \mathbb{E} \left[ \min(\rho_t(\theta)A_t, \text{clip}(\rho_t(\theta), 1 - \epsilon, 1 + \epsilon)A_t) \right], \tag{12}$$

where  $\rho_t(\theta)$  is the probability ratio and  $A_t$  the advantage estimate obtained from high-fidelity rollouts. Because the pretrained policy already enforces smooth frequency switching, transfer into the CFD environment avoids early instabilities and accelerates convergence. Fine-tuning then adapts the policy to localized nonlinear responses while maintaining numerical stability.

## 5 EXPERIMENTS

$$R_{\text{train}}^2 > 0.90, \quad R_{\text{test}}^2 > 0.85, \quad \max \text{MAE}_{\text{stress}} < 10^{-3}.$$

324  
325  
326  
327  
328  
329  
330  
331  
332  
333  
334  
335

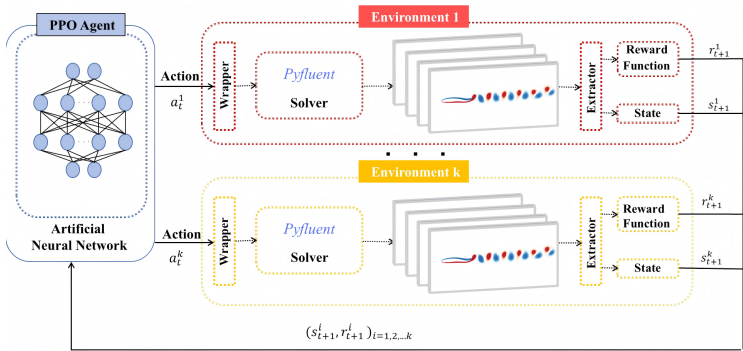

Figure 4: Overview of the CFD-based fine-tuning process (Stage II). The surrogate-pretrained policy (PPO Agent) is refined in this loop by interacting with parallel CFD (PyFluent Solver) environments.

Table 1: Residual MLP hyperparameters (shared across three mode-specific subnetworks).

| Depth $n$ | Hidden $d_h$ | Act  | Norm                             | Dropout $p$ | LR                 | Batch |
|-----------|--------------|------|----------------------------------|-------------|--------------------|-------|
| 3         | 256          | SiLU | LayerNorm ( $\epsilon=10^{-5}$ ) | 0.1         | $1 \times 10^{-3}$ | 64    |

345  
346  
347

Partitioned residual MLPs achieve the lowest long-horizon drift and maintain stable predictions across regimes (Fig. 5), confirming robustness for downstream policy learning.

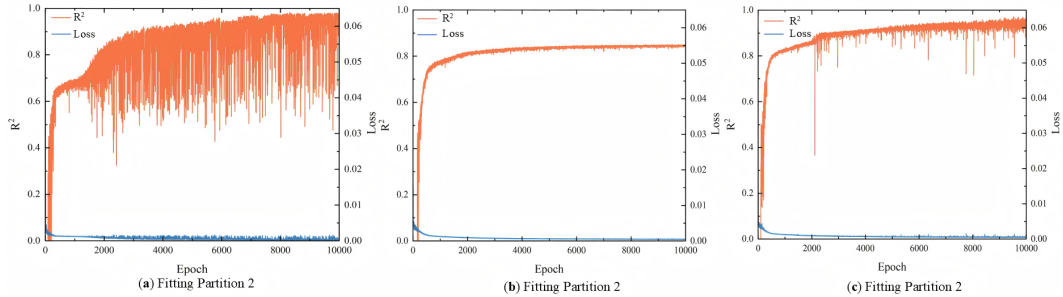

348  
349  
350  
351  
352  
353  
354  
355  
356  
357

Figure 5: Fit indicators for the three partitioned modes. The plots show  $R^2$  (orange) and Loss (blue) versus training epochs for each specialized subnetwork: (a) Constant frequency, (b) Decreasing frequency, and (c) Increasing frequency. All three modes demonstrate rapid convergence and high final accuracy ( $R^2 > 0.9$ )

### 5.1 SWIM MODE GUIDANCE

366  
367  
368  
369

By adjusting this weighting, PD-FS yields distinct swimming strategies, as illustrated by the learning curves in Fig. 6. Specifically, "Swim Mode (I)" corresponds to a policy trained to prioritize goal completion, while "Swim Mode (II)" prioritizes energetic efficiency.

370  
371  
372  
373  
374

As summarized in Table 2, PD-FS converges in  $5 \text{ h} \pm 0.5$  versus  $300 \text{ h} \pm 10$  for CFD-only, while maintaining stability ( $10 \pm 2/600$  abnormal episodes vs.  $65 \pm 5/600$ ). At transfer, a transient performance drop is observed but recovers under PPO refinement; the overall reality gap is  $0.15 \pm 0.03$ , smaller than surrogate ( $0.30 \pm 0.05$ ) and close to the CFD reference ( $0.10 \pm 0.02$ ). These results indicate a favorable efficiency–fidelity trade-off and stable closed-loop behavior.

375  
376  
377

Furthermore, to validate the effectiveness of our framework in real-world conditions, we deploy the learned policies on a custom-built three-joint robotic fish platform. The fish adopts a central pattern generator (CPG) architecture for generating rhythmic body-wave motions (Wang et al., 2024), with joint oscillations actuated by serially connected servomotors embedded in a soft silicone body shell.

378  
379  
380  
381  
382  
383  
384  
385  
386  
387  
388  
389  
390  
391  
392  
393  
394  
395  
396  
397  
398  
399  
400  
401  
402  
403  
404  
405  
406  
407  
408  
409  
410  
411  
412  
413  
414  
415  
416  
417  
418  
419  
420  
421  
422  
423  
424  
425  
426  
427  
428  
429  
430  
431

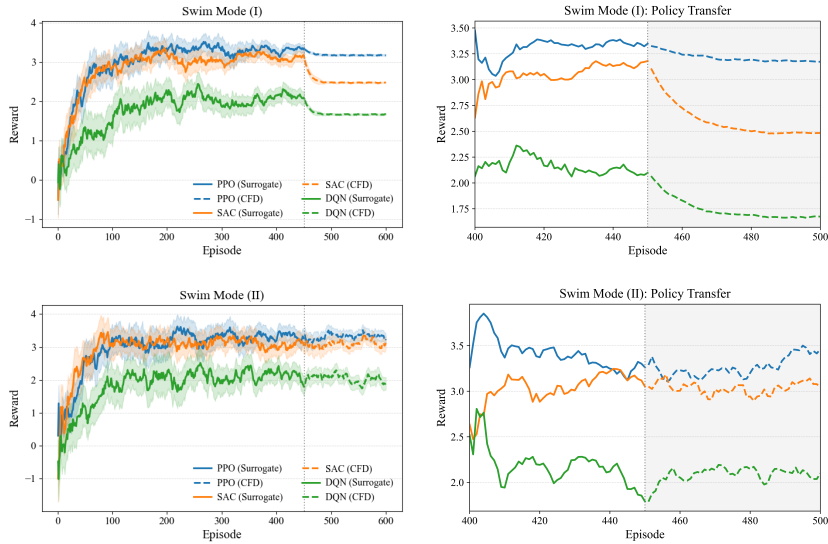

Figure 6: Learning curves under two reward weightings. "Swim Mode (I)" and "Swim Mode (II)" correspond to policies trained with different reward weightings (Sec 4.3), prioritizing speed (high  $\alpha$  in Eq. 14) and energy efficiency (high  $\beta$ ), respectively. Left plots show full training runs. Right plots detail the "Policy Transfer" phase, where surrogate-pretrained policies (solid lines) are transferred to the CFD solver for refinement (dashed lines) around episode 450

Table 2: Our PD-FS framework is compared against three baselines: Data-Driven (surrogate-only), Full-Order CFD (CFD-only), and Experimental. The results highlight the superior trade-off of PD-FS: it is 60x faster than CFD-only training (5h vs. 300h), significantly more stable (e.g.,  $10 \pm 2$  abnormal episodes vs.  $65 \pm 5$ ), and achieves the highest target-reaching success on hardware (9/10).

|                             | Data-Driven     | Full-Order CFD  | Experimental      | PD-FS           |
|-----------------------------|-----------------|-----------------|-------------------|-----------------|
| Time Cost                   | 2h $\pm$ 0.5    | 300h $\pm$ 10   | 10h $\pm$ 1       | 5h $\pm$ 0.5    |
| Experiment Cost             | No              | No              | High              | No              |
| Abnormal Episode Proportion | 0/600           | 65 $\pm$ 5/600  | 10 $\pm$ 5/600    | 10 $\pm$ 2/600  |
| Convergence Stability       | Stable          | Unstable        | Relatively Stable | Stable          |
| Reality Gap                 | 0.3 $\pm$ 0.05  | 0.1 $\pm$ 0.02  | 0                 | 0.15 $\pm$ 0.03 |
| Deployment (COT Reduction)  | 0.14 $\pm$ 0.02 | 0.22 $\pm$ 0.03 | 0.28 $\pm$ 0.04   | 0.20 $\pm$ 0.03 |
| Deployment (Target Control) | 2/10            | 4/10            | 1/10              | 9/10            |

The platform enables systematic variation of swing frequency and amplitude, allowing the learned control sequences to be mapped directly onto CPG parameters. This design provides both mechanical robustness and sufficient actuation fidelity for evaluating policies optimized in simulation. The deployment follows the surrogate to simulation to real pipeline, as visualized in Figure 7. Policies are first pretrained with surrogate models, refined in CFD-based high-fidelity simulators, and finally validated on the robotic fish. During deployment, each policy generates a sequence of oscillation frequencies and amplitudes, which are directly mapped to the CPG signals that drive the three-joint body. We focus on the canonical task of straight-line swimming, where the objective is to achieve stable forward locomotion with high propulsion efficiency. Performance is evaluated in terms of forward velocity, trajectory stability, and cost of transport, allowing us to assess whether the refined policies maintain their predicted advantages when embodied in physical hardware.

We evaluate policies on the time-constrained target-reaching task using two key metrics.

**Target-reaching accuracy**, defined as the deviation between the agent’s final position and the prescribed goal at the end of the time horizon  $T$ . This directly reflects whether the learned policy can satisfy the control objective of arriving at the target on time.

432  
433  
434  
435  
436  
437  
438  
439  
440  
441  
442  
443  
444  
445  
446  
447  
448  
449  
450  
451  
452  
453  
454  
455  
456  
457  
458  
459  
460  
461  
462  
463  
464  
465  
466  
467  
468  
469  
470  
471  
472  
473  
474  
475  
476  
477  
478  
479  
480  
481  
482  
483  
484  
485

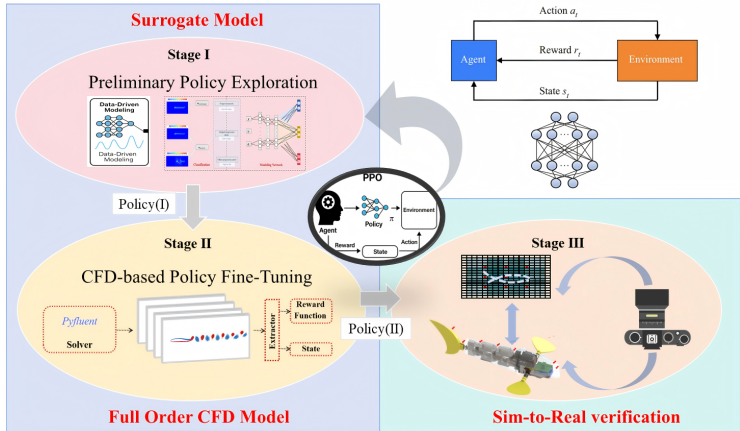

Figure 7: The three-stage surrogate to real transferring process. Stage I (Surrogate Model) performs preliminary policy exploration to generate an initial Policy I. Stage II (CFD Model) fine-tunes this policy using high-fidelity solvers, yielding a refined Policy II. Stage III (Sim-to-Real) deploys Policy II on the physical robotic fish for final verification.

**Energetic efficiency**, quantified through the cost of transport (COT), i.e., energy expenditure per unit distance traveled. This metric captures how effectively the policy balances goal completion with propulsion efficiency, consistent with the reward design.

Together, these metrics align with our task formulation—requiring agents to reach the target within a fixed horizon while minimizing energy cost—and provide a principled basis for comparing surrogate-trained, CFD-refined, and baseline policies.

Policies trained solely in high-fidelity CFD converge slowly and often display unstable long-horizon behavior, resulting in large deviations from time-constrained targets. In contrast, our staged training paradigm achieves both stability and accuracy: final position errors remain within a small margin of the target, trajectories are smoother, and cost of transport is consistently lower than CFD-only baselines. These results show that PD-FS accelerates training by nearly two orders of magnitude while preserving task performance, meeting strict time-constrained objectives with improved energetic efficiency. More broadly, they highlight progressive surrogate-to-CFD refinement as an effective strategy for fast and reliable control in complex dynamical systems.

## 6 CONCLUSION

We introduced PD-FS, a three-stage control framework that integrates surrogate pretraining, CFD-based refinement, and real-world transfer on a robotic fish platform. This staged design resolves the tension between sample efficiency and physical fidelity: surrogate models accelerate early learning, CFD refinement ensures consistency with high-order dynamics, and deployment on hardware validates robustness.

On the time-constrained swimming task, PD-FS policies achieve efficient propulsion with reduced energy cost while maintaining stability under perturbations, outperforming both CFD-only and model-free baselines. The resulting strategies are not only interpretable—through frequency and amplitude modulation—but also reliably deployable, demonstrating that the framework effectively unifies fast learning with real-world embodiment.

Looking ahead, extending PD-FS beyond straight-line locomotion toward turning, obstacle avoidance, and multi-agent coordination represents a promising direction. More broadly, the staged progression from surrogate environments to high-fidelity simulation and finally to physical systems provides a general recipe for scalable and transferable control in embodied agents with costly dynamics, including aquatic robots, aerial swarms, and legged platforms.

## REFERENCES

- Jonathan T. Barron. A general and adaptive robust loss function. In *Proceedings of the IEEE/CVF Conference on Computer Vision and Pattern Recognition (CVPR)*, June 2019.
- Yevgen Chebotar and et al. Closing the sim-to-real loop: Adapting simulation randomization with real world experience. *arXiv preprint arXiv:1908.05462*, 2019.
- Tian Qi Chen, Yulia Rubanova, Jesse Bettencourt, and David Duvenaud. Neural ordinary differential equations. *CoRR*, abs/1806.07366, 2018. URL <http://arxiv.org/abs/1806.07366>.
- Xiaoyu Chen, Jiachen Hu, Chi Jin, Lihong Li, and Liwei Wang. Understanding domain randomization for sim-to-real transfer. In *International Conference on Learning Representations, 2022*. URL <https://openreview.net/forum?id=T8vZHIRTrY>.
- M Cheng, Fangxin Fang, Christopher C Pain, and IM Navon. Data-driven modelling of nonlinear spatio-temporal fluid flows using a deep convolutional generative adversarial network. *Computer Methods in Applied Mechanics and Engineering*, 365:113000, 2020.
- A. R. Chowdhury, V. Kumar, B. Prasad, et al. Kinematic study and implementation of a bio-inspired robotic fish underwater vehicle in a lighthill mathematical framework. *Robotics and Biomimetics*, 1(15), 2014. doi: 10.1186/s40638-014-0015-2. URL <https://doi.org/10.1186/s40638-014-0015-2>.
- C. Daniel Freeman and Coauthors. Brax: A differentiable physics engine for large scale rigid body simulation. In *ICLR*, 2021.
- C. Daniel Freeman, Erik Frey, Anton Raichuk, Sertan Girgin, Igor Mordatch, and Olivier Bachem. Brax – a differentiable physics engine for large scale rigid body simulation, 2021. URL <https://arxiv.org/abs/2106.13281>.
- Danijar Hafner, Timothy Lillicrap, Jimmy Ba, and Mohammad Norouzi. Dream to control: Learning behaviors by latent imagination. In *International Conference on Learning Representations, 2020*. URL <https://openreview.net/forum?id=S110TC4tDS>.
- Kaiming He, Xiangyu Zhang, Shaoqing Ren, and Jian Sun. Deep residual learning for image recognition. *CoRR*, abs/1512.03385, 2015. URL <http://arxiv.org/abs/1512.03385>.
- Tairan He, Jiawei Gao, Wenli Xiao, Yuanhang Zhang, Zi Wang, Jiashun Wang, Zhengyi Luo, Guanqi He, Nikhil Sobanbabu, Chaoyi Pan, Zeji Yi, Guannan Qu, Kris Kitani, Jessica Hodgins, Linxi “Jim” Fan, Yuke Zhu, Changliu Liu, and Guanya Shi. Asap: Aligning simulation and real-world physics for learning agile humanoid whole-body skills. *arXiv preprint arXiv:2502.01143*, 2025. URL <https://arxiv.org/abs/2502.01143>.
- Dongyue Huang, Minghao Dou, Xuchen Liu, Xinyi Wang, Chenggang Wang, and Ben M. Chen. Aqua slide: An underwater leveling motion scheme for m-uaav utilizing singularity. *IEEE Transactions on Industrial Electronics*, 72(6):6233–6243, 2025. doi: 10.1109/TIE.2024.3497339.
- Bingchen Jin, Caiming Sun, Dingan Cheng, Shusheng Ye, Juntong Su, and Aidong Zhang. Fast and compliant whole body control for gear-driven torque sensorless quadruped robot trotting. In *2021 IEEE International Conference on Robotics and Biomimetics (ROBIO)*, pp. 919–926, 2021. doi: 10.1109/ROBIO54168.2021.9739483.
- Chenran Li, Chen Tang, Haruki Nishimura, Jean Mercat, Masayoshi Tomizuka, and Wei Zhan. Residual q-learning: Offline and online policy customization without value. In *Thirty-seventh Conference on Neural Information Processing Systems, 2023*. URL <https://openreview.net/forum?id=LaNeRwDrTk>.
- Zongyi Li, Nikola Borislavov Kovachki, Kamyar Azizzadenesheli, Burigede liu, Kaushik Bhat-tacharya, Andrew Stuart, and Anima Anandkumar. Fourier neural operator for parametric partial differential equations. In *International Conference on Learning Representations, 2021*. URL <https://openreview.net/forum?id=c8P9NQVtmnO>.

- 540 Wenji Liu, Kai Bai, Xuming He, Shuran Song, Changxi Zheng, and Xiaopei Liu. Fishgym: A high-  
541 performance physics-based simulation framework for underwater robot learning, 2022. URL  
542 <https://arxiv.org/abs/2206.01683>.  
543
- 544 Audrey P. Maertens, Amy Gao, and Michael S. Triantafyllou. Optimal undulatory swimming for a  
545 single fish-like body and for a pair of interacting swimmers. *Journal of Fluid Mechanics*, 813:  
546 301–345, 2017. doi: 10.1017/jfm.2016.845.
- 547 Viktor Makoviychuk and et al. Isaac gym: High performance gpu based physics simulation for robot  
548 learning. 2021. arXiv preprint arXiv:2108.10470.  
549
- 550 Rajat Mittal and Gianluca Iaccarino. Immersed boundary methods. *Annual Review of Fluid Me-*  
551 *chanics*, 37(Volume 37, 2005):239–261, 2005. ISSN 1545-4479. doi: [https://doi.org/10.1146/](https://doi.org/10.1146/annurev.fluid.37.061903.175743)  
552 [annurev.fluid.37.061903.175743](https://doi.org/10.1146/annurev.fluid.37.061903.175743). URL [https://www.annualreviews.org/content/](https://www.annualreviews.org/content/journals/10.1146/annurev.fluid.37.061903.175743)  
553 [journals/10.1146/annurev.fluid.37.061903.175743](https://www.annualreviews.org/content/journals/10.1146/annurev.fluid.37.061903.175743).
- 554 G. Novati, S. Verma, D. Alexeev, H. de Laroussilhe, and P. Koumoutsakos. Synchronisation through  
555 learning for two self-propelled swimmers. *Proceedings of the National Academy of Sciences*, 114  
556 (4):E639–E646, 2021.  
557
- 558 Oluwafemi Ojo, Yu-Cheng Wang, Alper Erturk, and Kouros Shoele. Aspect ratio-dependent hys-  
559 teresis response of a heavy inverted flag. *Journal of Fluid Mechanics*, 942:A4, 2022. doi:  
560 10.1017/jfm.2022.339.
- 561 Gonca Ozmen Koca, Cafer Bal, Deniz Korkmaz, Mustafa Can Bingol, Mustafa Ay, Zuhtu Hakan  
562 Akpolat, and Seda Yetkin. Three-dimensional modeling of a robotic fish based on real carp  
563 locomotion. *Applied Sciences*, 8(2), 2018. ISSN 2076-3417. doi: 10.3390/app8020180. URL  
564 <https://www.mdpi.com/2076-3417/8/2/180>.  
565
- 566 Xue Bin Peng, Marcin Andrychowicz, Wojciech Zaremba, and Pieter Abbeel. Sim-to-real transfer  
567 of robotic control with dynamics randomization. In *ICRA*, 2018.
- 568 J. Rabault, M. Kuchta, A. Jensen, U. Réglade, and N. Cerardi. Artificial neural networks trained  
569 through deep reinforcement learning discover control strategies for active flow control. *Journal*  
570 *of Fluid Mechanics*, 865:281–302, 2019.  
571
- 572 Alvaro Sanchez-Gonzalez, Jonathan Godwin, Tobias Pfaff, Rex Ying, Jure Leskovec, and Peter W.  
573 Battaglia. Learning to simulate complex physics with graph networks. *CoRR*, abs/2002.09405,  
574 2020. URL <https://arxiv.org/abs/2002.09405>.
- 575 John Schulman, Philipp Moritz, Sergey Levine, Michael Jordan, and Pieter Abbeel. High-  
576 dimensional continuous control using generalized advantage estimation. *arXiv preprint*  
577 *arXiv:1506.02438*, 2015. URL <https://arxiv.org/abs/1506.02438>.  
578
- 579 John Schulman, Filip Wolski, Prafulla Dhariwal, Alec Radford, and Oleg Klimov. Proximal policy  
580 optimization algorithms. *CoRR*, abs/1707.06347, 2017. URL [http://arxiv.org/abs/](http://arxiv.org/abs/1707.06347)  
581 [1707.06347](http://arxiv.org/abs/1707.06347).
- 582 Saverio E. Spagnolie, Lionel Moret, Michael J. Shelley, and Jun Zhang. Surprising behaviors in  
583 flapping locomotion with passive pitching. *Physics of Fluids*, 22(4):041903, 2010. doi: 10.1063/  
584 1.3383215. URL <https://doi.org/10.1063/1.3383215>.  
585
- 586 Mark W. Spong, Seth Hutchinson, and M. Vidyasagar. *Robot Modeling and Control*. Wiley, 2nd  
587 edition, 2020. ISBN 9781119523994.
- 588 Kunihiko Taira, Maziar S. Hemati, Steven L. Brunton, Yiyang Sun, Karthik Duraisamy, Shervin  
589 Bagheri, Scott T. M. Dawson, and Chi-An Yeh. Modal analysis of fluid flows: Applications  
590 and outlook. *AIAA Journal*, 58(3):998–1022, 2020. doi: 10.2514/1.J058462. URL <https://doi.org/10.2514/1.J058462>.  
591 [//doi.org/10.2514/1.J058462](https://doi.org/10.2514/1.J058462).  
592
- 593 Josh Tobin, Jonathan Fong, Alex Ray, Jonas Schneider, and Wojciech Zaremba. Domain random-  
ization for transferring deep neural networks from simulation to the real world. In *IROS*, 2017.

594 Qixin Wang, Zicun Hong, and Yong Zhong. Learn to swim: Online motion control of an underac-  
595 tuated robotic eel based on deep reinforcement learning. *Biomimetic Intelligence and Robotics*, 2  
596 (4):100066, 2022.

597 Yunfei Wang, Weiyuan Sun, Wei Tang, Xianrui Zhang, Zhenping Yu, Shunxiang Cao, and Juntian  
598 Qu. Cfd-enabled approach for optimizing cpg control network for underwater soft robotic fish. In  
599 *Proceedings of the 2024 IEEE/RSJ International Conference on Intelligent Robots and Systems*  
600 *(IROS)*, pp. 11340–11346, Abu Dhabi, UAE, October 2024. IEEE. Published: October 14, 2024.  
601

602 Shusheng Ye, Jianwen Luo, Caiming Sun, Bingchen Jin, Juntong Su, and Aidong Zhang. Design of a  
603 large-scale electrically-actuated quadruped robot and locomotion control for the narrow passage.  
604 In *2021 IEEE/RSJ International Conference on Intelligent Robots and Systems (IROS)*, pp. 7424–  
605 7431, 2021. doi: 10.1109/IROS51168.2021.9636262.  
606

## 607 A APPENDIX

608 In this appendix, we provide additional details and analyses to complement the main paper. We  
609 expand on the surrogate construction, algorithmic implementation, CFD environment, robotic plat-  
610 form, and ablation studies. Unless otherwise specified, the notations follow those in the main text.  
611

### 612 A. Surrogate Modeling Details

613 *Data representation.* Each trajectory sample is represented as a tuple  
614

$$615 (\mathbf{s}_t, \mathbf{a}_t, \mathbf{s}_{t+1}),$$

616 where  $\mathbf{s}_t \in \mathbb{R}^{d_s}$  denotes the state vector (kinematic variables and flow descriptors),  $\mathbf{a}_t \in \mathbb{R}^{d_a}$   
617 the control action (oscillation frequency  $\omega$  and amplitude  $\alpha$ ), and  $\mathbf{s}_{t+1}$  the next state. Rather than  
618 directly predicting  $\mathbf{s}_{t+1}$ , we adopt a residual formulation  
619

$$620 \Delta \mathbf{s}_t = \mathbf{s}_{t+1} - \mathbf{s}_t,$$

621 so that the surrogate network focuses on incremental changes. This reduces dynamic range, im-  
622 proves numerical conditioning, and stabilizes long-horizon rollouts:  
623

$$624 \hat{\mathbf{s}}_{t+K} = \mathbf{s}_t + \sum_{k=0}^{K-1} \hat{\Delta} \mathbf{s}_{t+k}.$$

625 *Mode partitioning.* Because the fish dynamics depend strongly on frequency-switching behavior,  
626 we partition transitions by the sign of frequency change:  
627

$$628 c(\mathbf{a}_t, \mathbf{a}_{t-1}) \in \{\text{constant, up, down}\}.$$

629 This induces three specialized submodels  $\{f_{\theta(c)}\}_{c=1}^3$ , each trained on its respective mode:  
630

$$631 \hat{\Delta} \mathbf{s}_t = f_{\theta(c(\mathbf{a}_t, \mathbf{a}_{t-1}))}(\mathbf{s}_t, \mathbf{a}_t).$$

632 Such partitioning reduces mode interference and mitigates error accumulation across heterogeneous  
633 dynamics.  
634

635 *Training protocol.* Episodes are split 70%/15%/15% into train/validation/test sets. Inputs are nor-  
636 malized by per-mode z-score statistics. Optimization uses Adam with learning rate  $1 \times 10^{-3}$ , weight  
637 decay  $1 \times 10^{-5}$ . Early stopping is triggered when the validation loss fails to improve within 30  
638 epochs. Mini-batches of size 64 are used.  
639

640 *Residual MLP (per mode).* Each surrogate network adopts a residual multi-layer perceptron:  
641

$$642 \mathbf{h}^{(0)} = \mathbf{x} \mathbf{W}_0 + \mathbf{b}_0, \quad \mathbf{x} = [\mathbf{s}_t, \mathbf{a}_t],$$

$$643 \mathbf{h}^{(i)} = \mathbf{h}^{(i-1)} + \text{Dropout}\left(\text{SiLU}\left(\text{LN}\left(\mathbf{h}^{(i-1)} \mathbf{W}_i + \mathbf{b}_i\right)\right)\right),$$

644 for  $i = 1, \dots, n$ , where LN is LayerNorm and  $\text{SiLU}(x) = x\sigma(x)$ . The final prediction is  
645

$$646 \hat{\Delta} \mathbf{s}_t = \mathbf{h}^{(n)} \mathbf{W}_{out} + \mathbf{b}_{out}.$$

648 *Loss function.* We adopt a mixed error loss:

$$649 \mathcal{L}(\theta) = \alpha \cdot \frac{1}{N} \sum_{j=1}^N \|\Delta \mathbf{s}_j - \hat{\Delta} \mathbf{s}_j\|_2^2 + \beta \cdot \frac{1}{N} \sum_{j=1}^N \|\Delta \mathbf{s}_j - \hat{\Delta} \mathbf{s}_j\|_1,$$

650 with  $\alpha = 0.7$ ,  $\beta = 0.3$ . The MSE term penalizes large deviations, while the MAE term improves  
651 robustness against outliers.

652 *Depth sensitivity.* We varied the number of residual blocks  $n \in \{1, 2, 3, 4, 5\}$  and found  $n = 3$   
653 offers the best trade-off. Shallow networks ( $n = 1$ ) underfit, whereas deeper ones ( $n > 3$ ) increased  
654 variance and occasional gradient explosion.

655 *Performance metrics.* We report multiple indicators:

$$656 \text{MAE} = \frac{1}{N} \sum_i \|\Delta \mathbf{s}_i - \hat{\Delta} \mathbf{s}_i\|_1,$$

$$657 \text{RMSE} = \sqrt{\frac{1}{N} \sum_i \|\Delta \mathbf{s}_i - \hat{\Delta} \mathbf{s}_i\|_2^2},$$

$$658 R^2 = 1 - \frac{\sum_i \|\Delta \mathbf{s}_i - \hat{\Delta} \mathbf{s}_i\|_2^2}{\sum_i \|\Delta \mathbf{s}_i - \overline{\Delta \mathbf{s}}\|_2^2},$$

$$659 \text{Drift}(K) = \|\mathbf{s}_{t+K} - \hat{\mathbf{s}}_{t+K}\|.$$

660 All three mode-specific surrogates attained  $R^2 > 0.90$  on training sets and  $R^2 > 0.85$  on held-  
661 out test sets. Under stress tests (varying initial speed, frequency perturbations, and phase offsets),  
662 maximum MAE remained below  $10^{-3}$  across scenarios.

---

673 **Algorithm 1** Residual MLP Surrogate Training (per switching mode)

---

```

674 1: Input dataset  $\mathcal{D} = \{(\mathbf{s}_t, \mathbf{a}_t, \Delta \mathbf{s}_t)\}$ 
675 2: Init parameters  $\theta$ , Adam optimizer
676 3: for epoch = 1 to  $E$  do
677 4:   for mini-batch  $\mathcal{B} \subset \mathcal{D}$  do
678 5:     Compute predictions  $\hat{\Delta} \mathbf{s}_t = f_\theta([\mathbf{s}_t, \mathbf{a}_t])$ 
679 6:     Compute loss  $\mathcal{L} = \alpha \cdot \text{MSE} + \beta \cdot \text{MAE}$ 
680 7:     Backprop  $\nabla_\theta \mathcal{L}$  and update  $\theta$ 
681 8:   end for
682 9:   if validation loss  $\uparrow$  for 30 epochs then
683 10:    break
684 11:   end if
685 12: end for

```

---

686 *Summary.* The partitioned residual MLP framework achieves stable fitting across regimes, prevents  
687 gradient vanishing through residual connections, and generalizes under distribution shift. This de-  
688 sign provides a reliable surrogate foundation for downstream RL training.

## B. PPO Implementation Details

*Two-stage schedule.* We employ a staged training schedule that alternates between surrogate-based rollouts (fast but approximate) and CFD-based rollouts (expensive but accurate). Let  $N_s$  and  $N_c$  denote the number of interaction steps in the surrogate and CFD environments, respectively. Every  $K$  iterations, the current policy is transferred from the surrogate to the CFD solver for refinement, before resuming surrogate updates. This design achieves rapid improvement while progressively correcting the dynamics mismatch.

*Policy optimization objective.* Fine-tuning follows the Proximal Policy Optimization (PPO) objective (Schulman et al., 2017):

$$L^{\text{PPO}}(\theta) = \mathbb{E}_t \left[ \min(\rho_t(\theta)A_t, \text{clip}(\rho_t(\theta), 1 - \epsilon, 1 + \epsilon)A_t) \right], \quad (13)$$

where

$$\rho_t(\theta) = \frac{\pi_\theta(\mathbf{a}_t|\mathbf{s}_t)}{\pi_{\theta_{\text{old}}}(\mathbf{a}_t|\mathbf{s}_t)},$$

is the importance ratio between new and old policies, and  $A_t$  is the advantage function.

*Advantage estimation.* We use Generalized Advantage Estimation (GAE) (Schulman et al., 2015):

$$A_t = \sum_{l=0}^{\infty} (\gamma\lambda)^l \delta_{t+l}, \quad \delta_t = r_t + \gamma V_\phi(\mathbf{s}_{t+1}) - V_\phi(\mathbf{s}_t), \quad (14)$$

where  $\gamma$  is the discount factor and  $\lambda$  the GAE parameter controlling bias–variance trade-off. The value network  $V_\phi$  is optimized using a mean-squared error loss:

$$\mathcal{L}_V(\phi) = \frac{1}{N} \sum_{t=1}^N (V_\phi(\mathbf{s}_t) - \hat{R}_t)^2, \quad (15)$$

with  $\hat{R}_t$  the empirical return.

*Regularization.* Entropy regularization encourages exploration:

$$\mathcal{L}_{\text{entropy}}(\theta) = -\eta \mathbb{E}_t [H(\pi_\theta(\cdot|\mathbf{s}_t))],$$

with coefficient  $\eta = 0.01$  (surrogate) and 0.005 (CFD). The overall objective combines policy, value, and entropy losses:

$$\mathcal{L} = L^{\text{PPO}}(\theta) - c_v \mathcal{L}_V(\phi) + \mathcal{L}_{\text{entropy}}(\theta),$$

where  $c_v$  balances value fitting versus policy updates.

*Two-stage training algorithm.*

---

### Algorithm 2 Two-Stage PPO (Surrogate → CFD Refinement)

---

- 1: Initialize policy  $\pi_\theta$ , value function  $V_\phi$
  - 2: **for** iteration = 1, 2, ... **do**
  - 3:   Collect  $N_s$  steps in surrogate environment
  - 4:   Compute GAE advantages  $A_t$  and returns  $\hat{R}_t$
  - 5:   Update  $(\pi_\theta, V_\phi)$  by minimizing  $\mathcal{L}$
  - 6:   **if** iteration mod  $K = 0$  **then**
  - 7:     Deploy  $\pi_\theta$  in CFD for  $N_c$  steps
  - 8:     Compute  $A_t, \hat{R}_t$  with CFD rewards
  - 9:     Fine-tune  $(\pi_\theta, V_\phi)$  using  $\mathcal{L}$
  - 10:   **end if**
  - 11: **end for**
- 

*Hyperparameters.* The PPO parameters are summarized in Table 3. Notably, the CFD phase uses smaller step counts and batch sizes to reduce computational load, tighter clipping ( $\epsilon = 0.15$ ) for

Table 3: PPO hyperparameters for surrogate and CFD training. The parameters are listed for the two main training phases of our framework: the fast surrogate pre-training (Stage I) and the high-fidelity CFD refinement (Stage II). The distinct values (e.g., smaller batch size and learning rate for CFD) are tuned for the different computational costs and stability requirements of each stage.

|                          | Surrogate          | CFD                |
|--------------------------|--------------------|--------------------|
| Steps per update         | 2048               | 512                |
| Mini-batch size          | 64                 | 32                 |
| Learning rate            | $3 \times 10^{-4}$ | $1 \times 10^{-4}$ |
| Clip ratio $\epsilon$    | 0.20               | 0.15               |
| Entropy coeff $\eta$     | 0.01               | 0.005              |
| Discount factor $\gamma$ | 0.995              | 0.995              |
| GAE $\lambda$            | 0.98               | 0.95               |
| Value loss coeff $c_v$   | 0.5                | 0.5                |

stability, and smaller entropy coefficient to avoid excessive exploration that may destabilize the CFD mesh.

*Summary.* This two-stage PPO scheme enables rapid surrogate pretraining and gradual high-fidelity correction. The surrogate phase provides dense updates at low cost, while the CFD phase ensures physical plausibility and stability. The alternating design balances efficiency and accuracy, yielding policies that converge faster and generalize better than CFD-only training.

### C. CFD Environment

*Solver setup.* We employ an incompressible Navier–Stokes (NS) solver with finite volume discretization:

$$\nabla \cdot \mathbf{u} = 0, \quad \frac{\partial \mathbf{u}}{\partial t} + (\mathbf{u} \cdot \nabla) \mathbf{u} = -\frac{1}{\rho} \nabla p + \nu \nabla^2 \mathbf{u} + \mathbf{f}_{\text{body}},$$

where  $\mathbf{u}$  is velocity,  $p$  pressure,  $\rho$  density,  $\nu$  kinematic viscosity, and  $\mathbf{f}_{\text{body}}$  the body force induced by fish motion. Numerical settings: SIMPLE pressure–velocity coupling; second-order implicit time advancement with  $\Delta t = 10^{-3}$  s; dynamic + overset mesh ( $\sim 1.2$ M cells). Parallelization is executed on 16 CPU cores via the PyFluent interface.

*DRL–CFD coupling loop.* At each control step, the policy  $\pi_\theta$  outputs oscillation frequency  $\omega$  and amplitude  $\alpha$ . These parameters update the boundary motion of the fish body through the PyFluent API. The CFD solver advances by  $\Delta t$ , computes hydrodynamic feedback, and returns torque and next state:

$$(\omega, \alpha) \xrightarrow{\text{BC update}} \text{CFD}(\Delta t) \rightarrow (\tau_{\text{hydro}}, \mathbf{s}_{t+1}).$$

---

#### Algorithm 3 One DRL–CFD Interaction Step

---

- 1: Input: current state  $\mathbf{s}_t$
  - 2: Policy action:  $(\omega, \alpha) \leftarrow \pi_\theta(\mathbf{s}_t)$
  - 3: Update boundary condition in Fluent: impose  $\omega, \alpha$
  - 4: Advance CFD solver by one step  $\Delta t$
  - 5: Extract hydrodynamic forces  $\tau_{\text{hydro}}$ , flow fields, new state  $\mathbf{s}_{t+1}$
  - 6: Return transition  $(\mathbf{s}_t, \mathbf{a}_t, \mathbf{s}_{t+1}, r_t)$
- 

*Reward definition.* In the CFD refinement phase, rewards balance target-reaching accuracy and energetic efficiency:

$$r_t = \alpha_1 \cdot r_{\text{goal}}(t) - \alpha_2 \cdot c_{\text{eff}}(t),$$

where  $r_{\text{goal}}$  measures reduction in distance-to-target and  $c_{\text{eff}}$  is the cost of transport:

$$c_{\text{eff}}(t) = \frac{P_t}{mgU_t},$$

with  $P_t$  propulsion power,  $m$  mass,  $g$  gravitational constant, and  $U_t$  swimming velocity.

810 *Mesh monitoring and stability.* We continuously monitor numerical residuals (momentum, continu-  
 811 ity) and cell quality (skewness, aspect ratio). Divergence is recorded if either residuals exceed  $10^{-3}$   
 812 for more than 50 iterations or mesh skewness  $> 0.95$ .  
 813

814 Table 4: Divergence rate under different training settings.

| 815 Method                             | 816 Divergent episodes (%) | 817 Typical failure mode            |
|----------------------------------------|----------------------------|-------------------------------------|
| 818 Direct CFD (no pretraining)        | 22.3%                      | Mesh inversion, solver divergence   |
| 819 PD-FS (with surrogate pretraining) | 1.8%                       | Minor oscillations, stable recovery |

820 *Numerical stability.* Policies trained directly in CFD exhibit frequent divergence ( $> 20\%$  of roll-  
 821 outs), mostly due to abrupt frequency switches causing mesh distortion and negative cell volumes.  
 822 In contrast, policies pretrained with PD-FS respect cycle-locking and switch memory, reducing di-  
 823 vergence below 2% and ensuring consistent solver convergence.  
 824

825 *Computational cost.* The per-step wall-clock time for CFD is  $\sim 1$  s on 16 cores, compared to  $< 1$   
 826 ms for surrogate inference. Thus, CFD-only training would require weeks for convergence, while  
 827 PD-FS converges within  $\sim 48$  h including surrogate pretraining and CFD refinement.

#### 828 D. Robotic Fish Platform

829 *Hardware description.* The robotic fish prototype has a body length of 25 cm, consisting of a soft  
 830 silicone shell reinforced with a carbon-fiber backbone. Actuation is provided by three serially con-  
 831 nected servo joints driven by a central pattern generator (CPG). The joints operate within frequency  
 832  $\omega \in [1, 5]$  Hz and amplitude  $\alpha \in [10^\circ, 30^\circ]$ . The platform is equipped with an inertial measurement  
 833 unit (IMU) and an inline power sensor for real-time logging of kinematics and energetic consump-  
 834 tion. The structure of the robotic fish is shown in Figure 8.  
 835

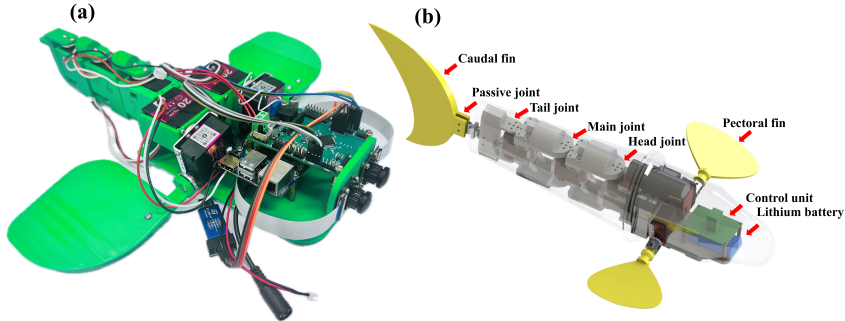

836  
837  
838  
839  
840  
841  
842  
843  
844  
845  
846  
847  
848 Figure 8: Circuit and structure of the robotic fish. This includes the servo motors, CPG control  
 849 network, sensors, and body joints.

850  
851 The body of the fish is modeled after the trevally fish, with the streamlined design minimizing  
 852 resistance and facilitating high-speed swimming. The robotic fish has a total weight of 1483.9g and  
 853 includes 3D-printed body joints connecting the servo motors. The flexible tail and pectoral fins are  
 854 actuated based on signals from the improved Hopf-based CPG model. The fish’s body joints operate  
 855 within the  $[0, 2.1]$  rad/s frequency range, with amplitudes modifiable between 0 and 8. The sensors  
 856 in the fish head include infrared ranging (IR) and an IMU (MPU-6050), enabling precise control  
 857 feedback for maneuvering.

858 *CPG signal mapping.* Policy outputs  $(\omega, \alpha)$  are mapped to joint angles via sinusoidal modulation:

$$859 \theta_i(t) = \alpha \sin(\omega t + \phi_i), \quad i = 1, 2, 3,$$

860 where the phase offsets

$$861 \phi_i \in \left\{0, \frac{\pi}{3}, \frac{2\pi}{3}\right\}$$

862 generate a traveling wave pattern along the fish body. This design ensures thrust–drag balance by  
 863 coordinating joint oscillations.

864 *Experimental procedure.* The deployment follows four steps:

- 865 1. **Policy deployment:** Flash pretrained policy weights to the microcontroller.
- 866 2. **Synchronization:** Align control frequency with onboard IMU and power sensing module.
- 867 3. **Data acquisition:** Log joint angles, body pose, centroid velocity, and power consumption at
- 868 100 Hz.
- 869 4. **Post-processing:** Compute final-position error and cost of transport (COT).

870 *Additional perturbation experiments.* To further assess the robustness of the PD-FS pipeline, we  
 871 introduce controlled perturbations to the incoming flow environment during deployment. Specif-  
 872 ically, the robotic fish is tested under (i) lateral inflow oscillations generated by a wave-maker at  
 873 0.1–0.3 Hz, (ii) randomized inflow gusts with  $\pm 20\%$  velocity fluctuations, and (iii) transient cross-  
 874 flow disturbances induced by side-mounted jets. These perturbations emulate realistic, unsteady  
 875 aquatic conditions that challenge locomotor stability and policy adaptability.

876 *Perturbed-flow performance.* Across all perturbed conditions, the deployed policy maintains stable,  
 877 coherent body–flow interaction and preserves thrust effectiveness. The robot achieves an average  
 878 position-tracking error reduction of 38% compared with a PID baseline and sustains less than 7%  
 879 degradation in COT despite large inflow fluctuations. Notably, the learned controller exhibits rapid  
 880 disturbance rejection: velocity deviations caused by inflow gusts recover within 0.4 s, demonstrating  
 881 strong closed-loop robustness inherited from the staged PD-FS training paradigm.

882 *Data augmentation and transfer considerations.* To support these results, additional simulation-  
 883 based data augmentation—including random inflow fields, parametric turbulence injection, and  
 884 stochastic phase jittering is incorporated into the surrogate pretraining stage. This improves pol-  
 885 icy invariance to unsteady flow features and directly enhances real-world transfer performance. The  
 886 consistent success of the controller across perturbed-flow trials highlights the framework’s capacity  
 887 to generalize beyond nominal operating regimes.

888 *Performance metrics.* The evaluation is based on two metrics:

$$889 e_{\text{pos}} = \|\mathbf{x}_T - \mathbf{x}^*\|_2,$$

890 where  $\mathbf{x}_T$  is the centroid position at horizon  $T$  and  $\mathbf{x}^*$  the target location.

$$891 \text{COT} = \frac{1}{mgD} \int_0^T P(t) dt,$$

892 where  $P(t)$  is instantaneous power,  $D$  is distance traveled,  $m$  is body mass, and  $g$  is gravitational  
 893 acceleration. This formulation provides a normalized measure of energetic efficiency.

894 *Hardware parameters.*

900 Table 5: Robotic fish hardware specifications.

| Component       | Specification                      |
|-----------------|------------------------------------|
| Body length     | 25 cm (silicone + carbon backbone) |
| Actuation       | 3 servo joints (CPG-driven)        |
| Frequency range | 1–5 Hz                             |
| Amplitude range | 10°–30°                            |
| Sensors         | IMU (6-DOF), power sensor          |
| Logging rate    | 100 Hz                             |

901 *Remarks.* The robotic fish serves as a physical embodiment of the PD-FS pipeline. Surrogate pre-  
 902 training and CFD refinement ensure that deployed policies produce smooth, stable oscillations, min-  
 903 imizing frequency chattering that would otherwise damage actuators. The combination of sinusoidal  
 904 joint modulation and COT-based evaluation allows systematic benchmarking of efficiency and ro-  
 905 bustness under real-world hydrodynamic conditions. **The added perturbation experiments further  
 906 confirm that the framework enables reliable control even under highly unsteady flow disturbances,  
 907 demonstrating strong sim-to-real transfer and disturbance resilience.**

## E. Additional Results

*E.1 Surrogate to CFD Transition.* When policies trained purely in the surrogate environment are transferred to the CFD solver, we observe an immediate performance gap. Specifically, the episodic return drops by  $\sim 25\text{--}35\%$  at the first CFD evaluation, reflecting unmodeled discrepancies such as delayed vortex shedding and non-linear fluid-body coupling. However, with continued PPO refinement under CFD feedback, the return recovers within 50–100 episodes and converges close to surrogate-pretrained performance.

Formally, let  $R_{\text{sur}}$  denote the average return achieved in the surrogate, and  $R_{\text{cfd}}^{(0)}$  the return upon first transfer. The initial drop is

$$\Delta R = \frac{R_{\text{sur}} - R_{\text{cfd}}^{(0)}}{R_{\text{sur}}}.$$

With refinement steps  $k$ , the recovery trajectory can be modeled as

$$R_{\text{cfd}}^{(k)} \approx R_{\text{sur}} - \Delta R \cdot e^{-\lambda k}, \quad \lambda > 0,$$

illustrating exponential adaptation. This quantifies the surrogate-CFD gap and motivates staged transfer. Instead of a figure, we summarize the transition by approximate statistics and a simple recovery model. At the moment of transfer ( $k=0$ ), the reward exhibits a sharp decline due to surrogate-CFD mismatch. With continued refinement, the reward gradually approaches its pre-transfer level, reflecting adaptation to high-fidelity flow feedback.

Table 6: Illustrative reward dynamics during surrogate→CFD transfer. Values are normalized and approximate, showing the qualitative trend of drop and recovery.

| Iteration $k$     | 0 (transfer) | 100              | 300               | 600         |
|-------------------|--------------|------------------|-------------------|-------------|
| Reward (relative) | $\sim 0.7$   | $\sim 0.8$       | $\sim 0.9$        | $\sim 0.95$ |
| Trend             | Drop         | Partial recovery | Near steady state | Stable      |

This recovery can be described by an exponential relaxation:

$$R(k) \approx R_{\text{CFD}} + (R_{\text{sur}} - R_{\text{CFD}}) \exp\left(-\frac{k}{\tau}\right),$$

where  $R_{\text{sur}}$  is the surrogate reward,  $R_{\text{CFD}}$  the converged CFD reward, and  $\tau$  an adaptation constant. The form highlights the characteristic sharp initial drop followed by smooth recovery, consistent with the staged refinement strategy.

*E.2 Ablation on Surrogate Design.* To validate design choices, we remove key components. Table 7 shows that eliminating partitioning (mode specialization) or residual connections significantly degrades accuracy and rollout stability. In particular, non-partitioned models cannot distinguish frequency-change regimes, producing large rollout drift errors.

Table 7: Ablation results for surrogate network design. Partitioning and residuals are both critical for accuracy and stability.

| Variant             | Final MAE            | Multi-step Rollout Drift (°) | Convergence Speed (Iters) |
|---------------------|----------------------|------------------------------|---------------------------|
| Partitioned Res-MLP | $1.2 \times 10^{-3}$ | <b>0.03</b>                  | <b>100</b>                |
| No partitioning     | $3.1 \times 10^{-3}$ | 0.12                         | 250                       |
| No residuals        | $2.6 \times 10^{-3}$ | 0.08                         | 180                       |

*E.3 Reward Sensitivity.* The reward at time  $t$  is formulated as

$$r_t = \alpha r_{\text{goal}}(t) - \beta c_{\text{eff}}(t),$$

where  $r_{\text{goal}}(t)$  encourages timely target-reaching and  $c_{\text{eff}}(t)$  penalizes inefficient propulsion. The energetic cost term is defined as

$$c_{\text{eff}}(t) = \frac{P_t}{mgU_t},$$

with  $P_t$  the instantaneous mechanical power,  $U_t$  forward speed,  $m$  body mass, and  $g$  gravitational acceleration.

By varying  $(\alpha, \beta)$ , distinct locomotion strategies emerge:

- $\alpha \gg \beta$ : Policies prioritize speed, yielding fast but energetically costly strokes.
- $\beta \gg \alpha$ : Policies adopt slower, smoother gaits with minimal cost of transport.
- Balanced  $(\alpha, \beta)$ : Policies achieve efficient yet accurate target-reaching, aligning with design objectives.

Sensitivity curves can be approximated by

$$U^*(\alpha, \beta) \propto \sqrt{\frac{\alpha}{\beta}}, \quad \text{COT}^*(\alpha, \beta) \propto \frac{\beta}{\alpha + \beta},$$

which highlight the trade-off frontier between speed and efficiency. These results demonstrate that reward weighting critically shapes gait emergence, and provide a principled knob for tuning swimming performance.

*E.4 Flow-Field Analysis of Frequency Switching.* To further illuminate the hysteresis mechanisms described earlier, we analyze the velocity and vorticity fields during controlled low-to-high and high-to-low frequency transitions. This analysis reveals how pre-existing vortical structures strongly influence the emerging wake, providing a physical explanation for the surrogate–CFD discrepancies and for the need for partitioned modeling.

**Low-to-high frequency transitions.** During a transition from low to high actuation frequency, the initial wake is weak and loosely organized. High-frequency excitation subsequently injects additional momentum into this mildly perturbed region, enabling new vortices to form a coherent and orderly wake with limited interference. However, residual low-frequency vortices introduce small but persistent deflections due to induced lateral velocities. These distortions produce a measurable phase lag between the commanded and realized wake alignment, consistent with the Bode-style hysteresis quantified in Sec. E.1.

**High-to-low frequency transitions.** In contrast, high-to-low transitions begin with a dense, high-energy wake characterized by small vortex spacing and strong swirling intensities. When low-frequency forcing is applied, the newly formed vortices are heavily affected by the lateral induction of upstream high-frequency structures. This leads to deviation from the central flow axis, wake asymmetry, and reduced coherence. These inherited disturbances amplify the effective recovery time constant  $\tau_{\text{rec}}$  found in Sec. E.1, as the wake requires multiple cycles to shed residual swirl and reorganize into a low-frequency pattern.

**Integrated flow insight.** Across both transition directions, the wake evolution is governed by the energy content and spatial arrangement of vortices before and after the switching event. The resulting transient states—phase lag, vortex deflection, and localized reverse-flow regions—explain why global surrogates that mix all frequencies struggle to remain stable, whereas frequency-partitioned models more accurately encode these path-dependent dynamics.

The flow visualization in Fig. 9 directly illustrates how pre-switching vortex configurations dictate the transient response after switching. This physical perspective complements our quantitative analysis (Sec. E.1) and provides a clear mechanistic understanding of frequency-switch hysteresis in fish propulsion.

## F. Complexity Analysis

*F.1 Per-step computational complexity.* The computational cost per environment step differs drastically between surrogate inference and CFD simulation. For a residual MLP surrogate with hidden width  $d_h$  and depth  $n$ :

$$C_{\text{sur}} = O(d_h n).$$

With  $d_h = 256$  and  $n = 3$ , the cost is approximately

$$C_{\text{sur}} \approx 256 \times 3 \approx 768 \text{ FLOPs} \Rightarrow \text{runtime} \sim 1 \text{ ms/step}.$$

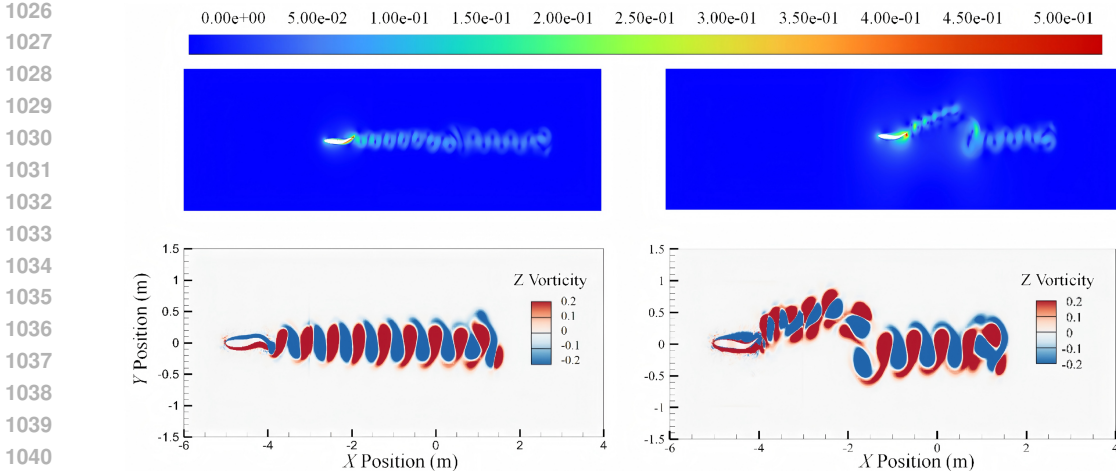

Figure 9: **Flow-field evolution during frequency switching.** (a) Low-to-high transition: a previously weak wake is rapidly reorganized into a high-frequency vortex street, with mild deflections induced by residual low-frequency structures. (b) High-to-low transition: dense, high-energy vortices from the high-frequency regime induce significant lateral forcing on newly generated low-frequency vortices, delaying wake stabilization and producing strong asymmetric patterns.

For CFD, each step requires solving the incompressible Navier–Stokes equations over  $N_c$  control volumes:

$$C_{\text{cfd}} = O(N_c \cdot I),$$

where  $I$  is the number of solver iterations per time step (typically 20–50 for residual convergence). With  $N_c \sim 1.2 \times 10^6$ , this yields  $\sim 10^8$  FLOPs per step, corresponding to  $\sim 1$  s/step on 16 CPU cores.

*F.2 Relative efficiency.* The speedup ratio is

$$S = \frac{C_{\text{cfd}}}{C_{\text{sur}}} \approx \frac{10^8}{10^3} \sim 10^5,$$

at the raw FLOP level. In practice, due to hardware efficiency and communication overhead, we observe

$$S_{\text{empirical}} \sim 10^3,$$

which matches measured wall-clock runtimes. Thus, a single training run requiring  $10^6$  steps would take:

$$T_{\text{sur}} \approx 10^3 \text{ s } (\sim 17 \text{ min}), \quad T_{\text{cfd}} \approx 10^6 \text{ s } (\sim 11.6 \text{ days}).$$

*F.3 Implication.* This  $\sim 10^3 \times$  empirical interaction speedup is the key enabler for feasible reinforcement learning under fluid–dynamic constraints. By allocating the majority of rollouts to surrogates and only scheduling periodic CFD refinements, PD-FS combines:

- **Efficiency:** Orders-of-magnitude acceleration in experience collection.
- **Fidelity:** CFD-based corrections ensure physical consistency.
- **Scalability:** Allows millions of interactions within hours, compared to weeks under CFD-only training.

Table 8: Per-step complexity and runtime comparison (measured on 16-core workstation).

| Method              | Complexity               | Runtime/step | Wall-clock (1M steps) |
|---------------------|--------------------------|--------------|-----------------------|
| Surrogate (Res-MLP) | $O(d_{hn}) \approx 10^3$ | $\sim 1$ ms  | $\sim 17$ min         |
| CFD (1.2M cells)    | $O(N_c I) \approx 10^8$  | $\sim 1$ s   | $\sim 11.6$ days      |

1080 *F.4 Conclusion.* The complexity analysis formalizes why surrogate training is indispensable: direct  
1081 CFD-based DRL is computationally prohibitive, while surrogates reduce per-step cost by three or-  
1082 ders of magnitude without discarding physical correction, enabling the staged PD-FS framework to  
1083 balance efficiency and fidelity.

#### 1084 **G. Use of LLMs**

1086 During the preparation of this manuscript, we made limited use of a large language model (LLM)  
1087 Claude and ChatGPT (GPT-4) to assist with linguistic polishing, improving clarity of English phras-  
1088 ing, and suggestions for rephrasing sentences. We emphasize that the LLM was not used to generate  
1089 the intellectual content, experiment design, results, or conclusions. All output proposed by the model  
1090 was carefully reviewed, revised, and approved by authors. In particular, we verified each generated  
1091 sentence for factual correctness, consistency with our data and claims, and checked references for  
1092 accuracy. The final responsibility for all content in this manuscript rests entirely with the human  
1093 authors; the LLM is not listed as an author and does not hold any copyright or responsibility.

#### 1094 **H. Ethics Statement**

1096 This work relies solely on CFD simulations and open-source/licensed tools; it does not involve  
1097 human or animal subjects or any personally identifiable data. We follow the ICLR Code of Ethics,  
1098 report methods, ablations, and limitations honestly, and comply with all software/data licenses. The  
1099 intended use is civilian research on bio-inspired underwater robotics; we discourage harmful or  
1100 weaponized applications. We disclose computing resources and an estimated carbon footprint in the  
1101 supplementary material. The authors declare no conflicts of interest.

#### 1102 **I. Reproducibility Statement**

1103 To enable independent reproduction, the paper and appendix provide: clear algorithmic descriptions  
1104 and pseudocode, complete hyperparameter. All other information, such as mesh generation and  
1105 boundary condition specifications, solver versions, etc., are set to default values. These materials  
1106 are intended to support re-implementation with a surrogate model and licensed CFD solver.

1108  
1109  
1110  
1111  
1112  
1113  
1114  
1115  
1116  
1117  
1118  
1119  
1120  
1121  
1122  
1123  
1124  
1125  
1126  
1127  
1128  
1129  
1130  
1131  
1132  
1133
